# Supplementary material
Source: publisher figshare collection journal article supplement (https://acs.figshare.com/ndownloader/files/21000348)
Supplement: Supplementary file 1 [file 21000348]

## Supporting Information

### **Applicability of Vapor-Deposited Thermoresponsive Hydrogel Thin Films in Ultrafast Humidity Sensors/Actuators**

*Fabian Muralter\*, Francesco Greco, Anna Maria Coclite*

Institute of Solid State Physics, NAWI Graz, Graz University of Technology, Petersgasse 16, 8010 Graz, Austria

\*corresponding author: [fmuralter@tugraz.at](mailto:fmuralter@tugraz.at)

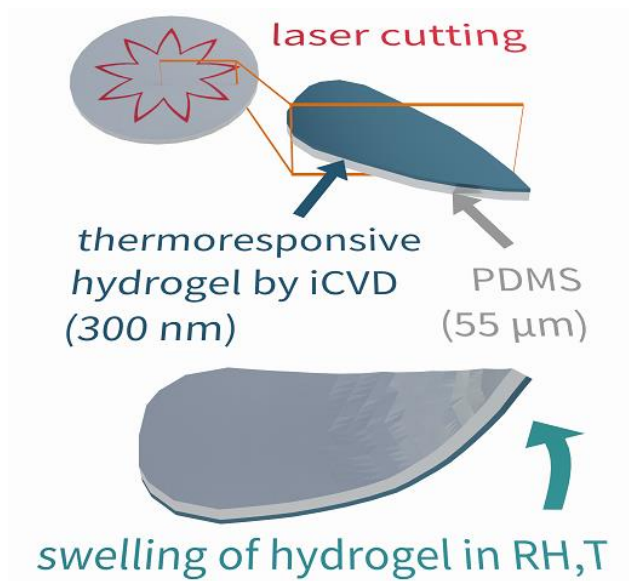

Figure S1: Schematics of the flower-shaped hygromorphic device used for demonstration of the applicability of the hydrogel thin film in sensor/actuator devices with petals that bend as a function of relative humidity (RH) and temperature ( $T$ )

Video S1: Bilayer flower-shaped hygromorphic actuator bending its petals due to swelling of the thermoresponsive hydrogel thin film (on top) as a function of relative humidity (bottom left of video) at a temperature of 25 °C

Video S2: Bilayer flower-shaped hygromorphic actuator bending its petals due to swelling of the thermoresponsive hydrogel thin film (on the bottom) as a function of temperature (top left of video) at a relative humidity of the environment of 35% RH (measured at 25 °C)
